# Supplementary material for: The Impacts of Prenatal Mental Health Issues on Birth Outcomes during the COVID-19 Pandemic: A Scoping Review
Source: MDPI journal article supplement (doi:10.3390/ijerph19137670), 2022-06-23
Supplement: s1 [file s1]

## Supplementary Materials

**Table S1. Detailed search strings**

**Ovid MEDLINE(R) ALL <1946 to July 26, 2021>**

| #  | Search Statement                                                                                                                                                                                                                                                                                                                                                                                                                  | Results |
|----|-----------------------------------------------------------------------------------------------------------------------------------------------------------------------------------------------------------------------------------------------------------------------------------------------------------------------------------------------------------------------------------------------------------------------------------|---------|
| 1  | exp Coronavirus/                                                                                                                                                                                                                                                                                                                                                                                                                  | 85818   |
| 2  | exp Coronavirus Infections/                                                                                                                                                                                                                                                                                                                                                                                                       | 104836  |
| 3  | (coronavirus* or corona virus* or OC43 or NL63 or 229E or HKU1 or HCoV* or ncov* or covid* or sars-cov* or sarscov* or Sars-coronavirus* or Severe Acute Respiratory Syndrome Coronavirus*).mp.                                                                                                                                                                                                                                   | 176694  |
| 4  | (or/1-3) and 20200601:20301231.(ep).                                                                                                                                                                                                                                                                                                                                                                                              | 115200  |
| 5  | 4 not (SARS or SARS-CoV or MERS or MERS-CoV or Middle East respiratory syndrome or camel* or dromedar* or equine or coronary or coronal or coudence* or covidien or influenza virus or HIV or bovine or calves or TGEV or feline or porcine or BCoV or PED or PEDV or PDCoV or FIPV or FCoV or SADS-CoV or canine or CCov or zoonotic or avian influenza or H1N1 or H5N1 or H5N6 or IBV or murine corona*).mp.                    | 46230   |
| 6  | ((pneumonia or covid* or coronavirus* or corona virus* or ncov* or 2019-ncov or sars*).mp. or exp pneumonia/) and Wuhan.mp.                                                                                                                                                                                                                                                                                                       | 5588    |
| 7  | (2019-ncov or ncov19 or ncov-19 or 2019-novel CoV or sars-cov2 or sars-cov-2 or sarscov2 or sarscov-2 or Sars-coronavirus2 or Sars-coronavirus-2 or SARS-like coronavirus* or coronavirus-19 or covid19 or covid-19 or covid 2019 or ((novel or new or nouveau) adj2 (CoV on nCoV or covid or coronavirus* or corona virus or Pandemi*2)) or ((covid or covid19 or covid-19) and pandemic*2) or (coronavirus* and pneumonia)).mp. | 161412  |
| 8  | COVID-19.rx,px,ox. or severe acute respiratory syndrome coronavirus 2.os.                                                                                                                                                                                                                                                                                                                                                         | 4645    |
| 9  | Covid-19/                                                                                                                                                                                                                                                                                                                                                                                                                         | 94250   |
| 10 | (variant* adj2 (India* or "South Africa*" or UK or English or Brazil* or alpha or beta or delta or gamma or kappa or lambda or "P.1" or "C.37")).mp.                                                                                                                                                                                                                                                                              | 4449    |
| 11 | ("B.1.1.7" or "B.1.351" or "B.1.617.1" or "B.1.617.2").mp.                                                                                                                                                                                                                                                                                                                                                                        | 530     |
| 12 | or/5-11                                                                                                                                                                                                                                                                                                                                                                                                                           | 167457  |
| 13 | 12 and 20191101:20301231.(dt).                                                                                                                                                                                                                                                                                                                                                                                                    | 161454  |
| 14 | exp Pregnancy Complications/                                                                                                                                                                                                                                                                                                                                                                                                      | 442678  |
| 15 | exp Pregnancy Outcome/                                                                                                                                                                                                                                                                                                                                                                                                            | 77812   |
| 16 | exp Obstetric Labor Complications/                                                                                                                                                                                                                                                                                                                                                                                                | 72047   |
| 17 | exp Obstetric Labor, Premature/                                                                                                                                                                                                                                                                                                                                                                                                   | 28601   |
| 18 | exp Fetal Death/                                                                                                                                                                                                                                                                                                                                                                                                                  | 29935   |
| 19 | "congenital, hereditary, and neonatal diseases and abnormalities"/                                                                                                                                                                                                                                                                                                                                                                | 890     |
| 20 | ("adverse birth outcome*" or stillbirth* or "low birthweight*" or "low birth weigh" or "small for gestational age" or SGA or macrosomia or "neonatal death" or "congenital anomal*").mp.                                                                                                                                                                                                                                          | 66064   |
| 21 | ("spontaneous abortion*" or "postpartum hemorrhage" or "post partum hemorrhage").mp.                                                                                                                                                                                                                                                                                                                                              | 10894   |
| 22 | ((labor or labour or deliver* or childbirth* or birth*) adj3 (prematur* or pre-mature* or preterm or pre-term or early or difficult*).mp.                                                                                                                                                                                                                                                                                         | 70898   |
| 23 | or/14-22                                                                                                                                                                                                                                                                                                                                                                                                                          | 527852  |
| 24 | exp Mental Health/                                                                                                                                                                                                                                                                                                                                                                                                                | 45210   |
| 25 | exp Psychology/                                                                                                                                                                                                                                                                                                                                                                                                                   | 68604   |
| 26 | exp Psychiatry/                                                                                                                                                                                                                                                                                                                                                                                                                   | 106292  |
| 27 | Anxiety/                                                                                                                                                                                                                                                                                                                                                                                                                          | 89498   |
| 28 | Depression/                                                                                                                                                                                                                                                                                                                                                                                                                       | 130306  |
| 29 | (mental* adj3 (ill* or well* or disorder* or disease* or health* or unwell*).mp.                                                                                                                                                                                                                                                                                                                                                  | 403543  |
| 30 | anxiety disorders/ or agoraphobia/ or anxiety, separation/ or neurocirculatory asthenia/ or neurotic disorders/ or obsessive-compulsive disorder/ or hoarding disorder/ or panic disorder/ or phobic disorders/ or phobia, social/                                                                                                                                                                                                | 82771   |
| 31 | ((anxiety or depression or depressive or hypervigilance or agoraphobia or neuroses or neurosis or neurotic or paranoi* or catastrophiz* or catastrophis* or) and obsessive-compulsive) or panic or phobia or stress or ptsd or psycho* or "internalising symptom*" or "internalizing symptom*" or wellness or "seasonal affective disorder*" or psychiatr*).mp.                                                                   | 2890504 |
| 32 | (dysthymic disorder* or "use disorder" or "psychotropic drug*" or "brain disease*" or "neurotransmitter agent*" or cognitive or "social problems" or "alcohol abuse*" or "drug abuse*").mp.                                                                                                                                                                                                                                       | 594133  |
| 33 | ("seasonal affective disorder*" or "internalizing symptoms" or "common mental disorders" or cmd or cmds).ti.ab.                                                                                                                                                                                                                                                                                                                   | 8063    |
| 34 | or/24-33                                                                                                                                                                                                                                                                                                                                                                                                                          | 3387821 |
| 35 | 13 and 23 and 34                                                                                                                                                                                                                                                                                                                                                                                                                  | 231     |

## Embase &lt;1974 to 2021 July 26&gt;

| #  | Search Statement                                                                                                                                                                                                                                                                                                                                                                                                                                                                                                                                                                                                                                                                                                                                                                                                                                                                                                                                                                                                                                                                                                                                                                                                                                                                                                                                                                                                                                                                                            | Results |
|----|-------------------------------------------------------------------------------------------------------------------------------------------------------------------------------------------------------------------------------------------------------------------------------------------------------------------------------------------------------------------------------------------------------------------------------------------------------------------------------------------------------------------------------------------------------------------------------------------------------------------------------------------------------------------------------------------------------------------------------------------------------------------------------------------------------------------------------------------------------------------------------------------------------------------------------------------------------------------------------------------------------------------------------------------------------------------------------------------------------------------------------------------------------------------------------------------------------------------------------------------------------------------------------------------------------------------------------------------------------------------------------------------------------------------------------------------------------------------------------------------------------------|---------|
| 1  | ((exp Coronavirus/ or exp Coronavirus Infections/ or (coronavirus* or corona virus* or OC43 or NL63 or 229E or HKU1 or HCoV* or nCoV* or covid* or sars-cov* or sarscov* or Sars-coronavirus* or Severe Acute Respiratory Syndrome Coronavirus* or D614G).mp.) not (SARS or SARS-CoV or MERS or MERS-CoV or Middle East respiratory syndrome or camel* or dromedar* or equine or coronary or coronal or covidence* or coviden or influenza virus or HIV or bovine or calves or TGEV or feline or porcine or BCoV or PED or PEDV or PDCoV or FIPV or FCoV or SADS-CoV or canine or CCov or zoonotic or avian influenza or H1N1 or H5N1 or H5N6 or IBV or murine corona*).mp.) or coronavirus disease 2019/ or (((pneumonia or covid* or coronavirus* or corona virus* or nCoV* or 2019-ncov or sars*).mp. or exp pneumonia/) and Wuhan.mp.) or ("coronavirus disease 2019" or "2019 nCoV" or nCoV19 or nCoV-19 or "2019 novel CoV" or severe acute respiratory syndrome coronavirus 2 or sars-cov2 or sars-cov-2 or sarscov2 or sarscov-2 or Sars-coronavirus2 or Sars-coronavirus-2 or SARS-like coronavirus* or coronavirus-19 or covid19 or covid-19 or "covid 2019" or "B.1.1.7" or "B.1.351" or "B.1.617.1" or "B.1.617.2" or ((cov* or corona* or SARS) and (variant* adj2 (India* or "South Africa*" or UK or English or Brazil* or alpha or beta or delta or gamma or kappa or lambda or "P.1" or "C.37")))) or ((novel or new or nouveau) adj2 (CoV or nCoV or coronavirus* or corona virus*))).mp. | 175153  |
| 2  | "parameters concerning the fetus, newborn and pregnancy"/ or apgar score/ or birth weight/ or fetus mortality/ or fetus outcome/ or fetus risk/ or fetus weight/ or gestational age/ or live birth/ or exp perinatal morbidity/ or perinatal mortality/ or pregnancy outcome/ or prenatal mortality/ or exp fetus death/                                                                                                                                                                                                                                                                                                                                                                                                                                                                                                                                                                                                                                                                                                                                                                                                                                                                                                                                                                                                                                                                                                                                                                                    | 316934  |
| 3  | exp labor complication/ or exp pregnancy complication/                                                                                                                                                                                                                                                                                                                                                                                                                                                                                                                                                                                                                                                                                                                                                                                                                                                                                                                                                                                                                                                                                                                                                                                                                                                                                                                                                                                                                                                      | 308606  |
| 4  | birth/ or birth weight/ or caesarean birth/ or "labor (childbirth)"/ or natural childbirth/ or premature birth/ or birth injuries/ or birth trauma/                                                                                                                                                                                                                                                                                                                                                                                                                                                                                                                                                                                                                                                                                                                                                                                                                                                                                                                                                                                                                                                                                                                                                                                                                                                                                                                                                         | 244903  |
| 5  | (exp congenital disorder/ and (neonat* or newborn*).mp.) or newborn disease/ or dysmaturity/ or immaturity/ or large for gestational age/ or low birth weight/ or neonatal alloimmune thrombocytopenia/ or neonatal hemorrhage/ or neonatal hyperbilirubinemia/ or neonatal pneumonia/ or neonatal respiratory distress syndrome/ or neonatal stress/ or neonatal thrombocytopenia/ or newborn anemia/ or newborn apnea/ or newborn diabetes mellitus/ or newborn hemolytic disease/ or newborn hepatitis/ or newborn hypoxia/ or newborn infection/ or newborn jaundice/ or newborn ophthalmia/ or newborn sepsis/ or newborn tetanus/ or perinatal asphyxia/ or perinatal stress/ or prematurity/ or retrolental fibroplasia/ or "transient tachypnea of the newborn"/ [mp=title, abstract, heading word, drug trade name, original title, device manufacturer, drug manufacturer, device trade name, keyword, floating subheading word, candidate term word]                                                                                                                                                                                                                                                                                                                                                                                                                                                                                                                                             | 332734  |
| 6  | ("adverse birth outcome*" or stillbirth* or "low birthweight*" or "low birth weigh" or "small for gestational age" or SGA or macrosomia or "neonatal death" or "congenital anomal*").mp.                                                                                                                                                                                                                                                                                                                                                                                                                                                                                                                                                                                                                                                                                                                                                                                                                                                                                                                                                                                                                                                                                                                                                                                                                                                                                                                    | 93650   |
| 7  | ((((labor or labour or deliver* or childbirth* or birth*) adj3 (prematur* or pre-mature* or preterm or pre-term or early or difficult*)) or "spontaneous abortion*").mp.                                                                                                                                                                                                                                                                                                                                                                                                                                                                                                                                                                                                                                                                                                                                                                                                                                                                                                                                                                                                                                                                                                                                                                                                                                                                                                                                    | 142238  |
| 8  | or/2-7                                                                                                                                                                                                                                                                                                                                                                                                                                                                                                                                                                                                                                                                                                                                                                                                                                                                                                                                                                                                                                                                                                                                                                                                                                                                                                                                                                                                                                                                                                      | 806020  |
| 9  | exp mental health/                                                                                                                                                                                                                                                                                                                                                                                                                                                                                                                                                                                                                                                                                                                                                                                                                                                                                                                                                                                                                                                                                                                                                                                                                                                                                                                                                                                                                                                                                          | 178312  |
| 10 | exp psychology/                                                                                                                                                                                                                                                                                                                                                                                                                                                                                                                                                                                                                                                                                                                                                                                                                                                                                                                                                                                                                                                                                                                                                                                                                                                                                                                                                                                                                                                                                             | 367416  |
| 11 | exp mental disease/                                                                                                                                                                                                                                                                                                                                                                                                                                                                                                                                                                                                                                                                                                                                                                                                                                                                                                                                                                                                                                                                                                                                                                                                                                                                                                                                                                                                                                                                                         | 2317236 |
| 12 | ((mental* or psychiatric*) adj3 (ill* or well* or disorder* or disease* or health* or unwell*)).mp.                                                                                                                                                                                                                                                                                                                                                                                                                                                                                                                                                                                                                                                                                                                                                                                                                                                                                                                                                                                                                                                                                                                                                                                                                                                                                                                                                                                                         | 609171  |
| 13 | ((((anxiety or depression or depressive or hypervigilance or agoraphobia or neuroses or neurosis or neurotic or paranoi* or catastrophiz* or catastrophis* or and obsessive-compulsive or panic or phobia or stress or ptsd or psycho* or "internalising symptom*" or "internalizing symptom*" or wellness or "seasonal affective disorder*" or psychiatr*).mp.                                                                                                                                                                                                                                                                                                                                                                                                                                                                                                                                                                                                                                                                                                                                                                                                                                                                                                                                                                                                                                                                                                                                             | 3137713 |
| 14 | (dysthymic disorder* or "use disorder" or "psychotropic drug*" or "brain disease*" or "neurotransmitter agent*" or cognitive or "social problems" or "alcohol abuse*" or "drug abuse*").mp.                                                                                                                                                                                                                                                                                                                                                                                                                                                                                                                                                                                                                                                                                                                                                                                                                                                                                                                                                                                                                                                                                                                                                                                                                                                                                                                 | 846971  |
| 15 | neurocirculatory asthenia.mp.                                                                                                                                                                                                                                                                                                                                                                                                                                                                                                                                                                                                                                                                                                                                                                                                                                                                                                                                                                                                                                                                                                                                                                                                                                                                                                                                                                                                                                                                               | 160     |
| 16 | major depression/ or dysthymic disorder/ or atypical depression/ or internalizing symptoms/ or seasonal affective disorder/ or mental health/ or primary mental health prevention/                                                                                                                                                                                                                                                                                                                                                                                                                                                                                                                                                                                                                                                                                                                                                                                                                                                                                                                                                                                                                                                                                                                                                                                                                                                                                                                          | 227428  |
| 17 | (depression or ("common mental disorders" or cmd or cmds)).mp.                                                                                                                                                                                                                                                                                                                                                                                                                                                                                                                                                                                                                                                                                                                                                                                                                                                                                                                                                                                                                                                                                                                                                                                                                                                                                                                                                                                                                                              | 731977  |
| 18 | or/9-17                                                                                                                                                                                                                                                                                                                                                                                                                                                                                                                                                                                                                                                                                                                                                                                                                                                                                                                                                                                                                                                                                                                                                                                                                                                                                                                                                                                                                                                                                                     | 4933377 |
| 19 | 1 and 8 and 18                                                                                                                                                                                                                                                                                                                                                                                                                                                                                                                                                                                                                                                                                                                                                                                                                                                                                                                                                                                                                                                                                                                                                                                                                                                                                                                                                                                                                                                                                              | 425     |
| 20 | limit 19 to dc=20190601-20210726                                                                                                                                                                                                                                                                                                                                                                                                                                                                                                                                                                                                                                                                                                                                                                                                                                                                                                                                                                                                                                                                                                                                                                                                                                                                                                                                                                                                                                                                            | 421     |

APA PsycInfo <1806 to July Week 3 2021>

| #  | Search Statement                                                                                                                                                                                                                                                                                                                                                                                                                                                                                                                                                                                                                                                                                                                                                                                                                                                                                                                                                                                                                                                                                                                                                                                                                                                                                                                                                                                                                                                     | Results |
|----|----------------------------------------------------------------------------------------------------------------------------------------------------------------------------------------------------------------------------------------------------------------------------------------------------------------------------------------------------------------------------------------------------------------------------------------------------------------------------------------------------------------------------------------------------------------------------------------------------------------------------------------------------------------------------------------------------------------------------------------------------------------------------------------------------------------------------------------------------------------------------------------------------------------------------------------------------------------------------------------------------------------------------------------------------------------------------------------------------------------------------------------------------------------------------------------------------------------------------------------------------------------------------------------------------------------------------------------------------------------------------------------------------------------------------------------------------------------------|---------|
| 1  | ((exp Coronavirus/ or (coronavirus* or corona virus* or OC43 or NL63 or 229E or HKU1 or HCoV* or ncov* or covid* or sars-cov* or sarscov* or Sars-coronavirus* or Severe Acute Respiratory Syndrome Coronavirus* or D614G).mp.) not (SARS or SARS-CoV or MERS or MERS-CoV or Middle East respiratory syndrome or camel* or dromedar* or equine or coronary or coronal or covidence* or coviden or influenza virus or HIV or bovine or calves or TGEV or feline or porcine or BCoV or PED or PEDV or PDCoV or FIPV or FCoV or SADS-CoV or canine or CCov or zoonotic or avian influenza or H1N1 or H5N1 or H5N6 or IBV or murine corona*).mp.) or Covid-19/ or (((pneumonia or covid* or coronavirus* or corona virus* or ncov* or 2019-ncov or sars*).mp. or exp pneumonia/) and Wuhan.mp.) or ("coronavirus disease 2019" or 2019-ncov or ncov19 or ncov-19 or 2019-novel CoV or severe acute respiratory syndrome coronavirus 2 or sars-cov2 or sars-cov-2 or sarscov2 or sarscov-2 or Sars-coronavirus2 or Sars-coronavirus-2 or SARS-like coronavirus* or coronavirus-19 or covid19 or covid-19 or covid 2019 or "B.1.1.7" or "B.1.351" or "B.1.617.1" or "B.1.617.2" or (variant* adj2 ("South Africa*" or UK or English or Brazil* or alpha or beta or delta or gamma or kappa or lambda or "P.1" or "C.37")) or ("B.1.1.7" or "B.1.351" or "B.1.617.1" or "B.1.617.2") or ((novel or new or nouveau) adj2 (CoV or nCoV or coronavirus* or corona virus))).mp. | 7625    |
| 2  | obstetrical complications/ or exp birth/ or birth injuries/ or caesarean birth/ or premature birth/                                                                                                                                                                                                                                                                                                                                                                                                                                                                                                                                                                                                                                                                                                                                                                                                                                                                                                                                                                                                                                                                                                                                                                                                                                                                                                                                                                  | 17831   |
| 3  | pregnancy outcomes/ or exp birth/ or induced abortion/ or exp obstetrical complications/ or spontaneous abortion/ or birth injuries/ or birth weight/                                                                                                                                                                                                                                                                                                                                                                                                                                                                                                                                                                                                                                                                                                                                                                                                                                                                                                                                                                                                                                                                                                                                                                                                                                                                                                                | 22232   |
| 4  | Stillbirths/                                                                                                                                                                                                                                                                                                                                                                                                                                                                                                                                                                                                                                                                                                                                                                                                                                                                                                                                                                                                                                                                                                                                                                                                                                                                                                                                                                                                                                                         | 0       |
| 5  | exp Congenital Disorders/                                                                                                                                                                                                                                                                                                                                                                                                                                                                                                                                                                                                                                                                                                                                                                                                                                                                                                                                                                                                                                                                                                                                                                                                                                                                                                                                                                                                                                            | 8202    |
| 6  | ("adverse birth outcome*" or stillbirth* or "low birthweight*" or "low birth weigh" or "small for gestational age" or SGA or macrosomia or "neonatal death" or "congenital anomal*").mp.                                                                                                                                                                                                                                                                                                                                                                                                                                                                                                                                                                                                                                                                                                                                                                                                                                                                                                                                                                                                                                                                                                                                                                                                                                                                             | 4037    |
| 7  | ((labor or labour or deliver* or childbirth* or birth*) adj3 (prematur* or pre-mature* or preterm or pre-term or early or difficult*)) or "spontaneous abortion*").mp.                                                                                                                                                                                                                                                                                                                                                                                                                                                                                                                                                                                                                                                                                                                                                                                                                                                                                                                                                                                                                                                                                                                                                                                                                                                                                               | 11298   |
| 8  | or/2-7                                                                                                                                                                                                                                                                                                                                                                                                                                                                                                                                                                                                                                                                                                                                                                                                                                                                                                                                                                                                                                                                                                                                                                                                                                                                                                                                                                                                                                                               | 35212   |
| 9  | 1 and 8                                                                                                                                                                                                                                                                                                                                                                                                                                                                                                                                                                                                                                                                                                                                                                                                                                                                                                                                                                                                                                                                                                                                                                                                                                                                                                                                                                                                                                                              | 25      |
| 10 | limit 9 to up=20190601-20211231                                                                                                                                                                                                                                                                                                                                                                                                                                                                                                                                                                                                                                                                                                                                                                                                                                                                                                                                                                                                                                                                                                                                                                                                                                                                                                                                                                                                                                      | 24      |

**CINAHL Plus with Full Text**  
**Limiters/Expanders**  
**Search Modes - Find all my search terms**

| #   | Query                                                                                                                                                                                                                                                                                                                                                                                                                                                                                                                                                                                                                                                                                                                                                                                                                                                                                                                                                                                                                                                                                                                                                                                                                                                                                | Results   |
|-----|--------------------------------------------------------------------------------------------------------------------------------------------------------------------------------------------------------------------------------------------------------------------------------------------------------------------------------------------------------------------------------------------------------------------------------------------------------------------------------------------------------------------------------------------------------------------------------------------------------------------------------------------------------------------------------------------------------------------------------------------------------------------------------------------------------------------------------------------------------------------------------------------------------------------------------------------------------------------------------------------------------------------------------------------------------------------------------------------------------------------------------------------------------------------------------------------------------------------------------------------------------------------------------------|-----------|
| S1  | ((((MH "Coronavirus+") OR (MH "Coronavirus Infections+") or (coronavirus* or corona virus* or OC43 or NL63 or 229E or HKU1 or HCoV* or ncov* or covid* or sars-cov* or sarscov* or Sars-coronavirus* or Severe Acute Respiratory Syndrome Coronavirus*)) NOT ( (SARS or SARS-CoV or MERS or MERS-CoV or Middle East respiratory syndrome or camel* or dromedar* or equine or coronary or coronal or cvidence* or covidien or influenza virus or HIV or bovine or calves or TGEV or feline or porcine or BCoV or PED or PEDV or PDCoV or FIPV or FCoV or SADS-CoV or canine or CCov or zoonotic or avian influenza or H1N1 or H5N1 or H5N6 or IBV or murine corona*)) or (MH "COVID-19") OR (MH "COVID-19 Pandemic") OR (MH "SARS-CoV-2") or(covid or 2019-ncov or ncov19 or ncov-19 or 2019-novel CoV or sars-cov2 or sars-cov-2 or sarscov2 or sarscov-2 or Sars-coronavirus2 or Sars-coronavirus-2 or SARS-like coronavirus* or coronavirus-19 or ((novel or new or nouveau) N2 (CoV or nCoV or coronavirus* or "corona virus" or Pandemi*)) or (variant* N2 (India* or "South Africa*" or UK or English or Brazil* or alpha or beta or delta or gamma or kappa or lambda or "P.1" or "C.37")) or ("B.1.1.7" or "B.1.351" or "B.1.617.1" or "B.1.617.2")) and EM 20190601-20301231 | 61,878    |
| S2  | (MH "Pregnancy Outcomes")                                                                                                                                                                                                                                                                                                                                                                                                                                                                                                                                                                                                                                                                                                                                                                                                                                                                                                                                                                                                                                                                                                                                                                                                                                                            | 25,494    |
| S3  | (MH "Pregnancy Complications+")                                                                                                                                                                                                                                                                                                                                                                                                                                                                                                                                                                                                                                                                                                                                                                                                                                                                                                                                                                                                                                                                                                                                                                                                                                                      | 100,854   |
| S4  | (MH "Perinatal Death")                                                                                                                                                                                                                                                                                                                                                                                                                                                                                                                                                                                                                                                                                                                                                                                                                                                                                                                                                                                                                                                                                                                                                                                                                                                               | 8,709     |
| S5  | (MH "Infant, Low Birth Weight+")                                                                                                                                                                                                                                                                                                                                                                                                                                                                                                                                                                                                                                                                                                                                                                                                                                                                                                                                                                                                                                                                                                                                                                                                                                                     | 15,192    |
| S6  | (MH "Infant, Large for Gestational Age") OR (MH "Infant, Postmature") OR (MH "Infant, Premature")                                                                                                                                                                                                                                                                                                                                                                                                                                                                                                                                                                                                                                                                                                                                                                                                                                                                                                                                                                                                                                                                                                                                                                                    | 24,902    |
| S7  | "adverse birth outcome*" or stillbirth* or "low birthweight*" or "low birth weigh" or "small for gestational age" or SGA or macrosomia or "neonatal death" or "congenital anomal"                                                                                                                                                                                                                                                                                                                                                                                                                                                                                                                                                                                                                                                                                                                                                                                                                                                                                                                                                                                                                                                                                                    | 25,026    |
| S8  | ((((labor or labour or deliver* or childbirth* or birth*) N3 (prematur* or pre-mature* or preterm or pre-term or early or difficult*)) or "spontaneous abortion*")                                                                                                                                                                                                                                                                                                                                                                                                                                                                                                                                                                                                                                                                                                                                                                                                                                                                                                                                                                                                                                                                                                                   | 31,274    |
| S9  | stillbirth* or "still birth*" or stillborn or "still born" or "intrauterine death" or "perinatal death" or "fetus death" or "fetal demise" or "fetal death"                                                                                                                                                                                                                                                                                                                                                                                                                                                                                                                                                                                                                                                                                                                                                                                                                                                                                                                                                                                                                                                                                                                          | 12,791    |
| S10 | S2 OR S3 OR S4 OR S5 OR S6 OR S7 OR S8 OR S9                                                                                                                                                                                                                                                                                                                                                                                                                                                                                                                                                                                                                                                                                                                                                                                                                                                                                                                                                                                                                                                                                                                                                                                                                                         | 163,731   |
| S11 | (MH "Mental Health") OR (MH "Behavioral and Mental Disorders+")                                                                                                                                                                                                                                                                                                                                                                                                                                                                                                                                                                                                                                                                                                                                                                                                                                                                                                                                                                                                                                                                                                                                                                                                                      | 897,469   |
| S12 | (MH "Psychology, Clinical+")                                                                                                                                                                                                                                                                                                                                                                                                                                                                                                                                                                                                                                                                                                                                                                                                                                                                                                                                                                                                                                                                                                                                                                                                                                                         | 1,037     |
| S13 | ((mental* or psychiatric*) N3 (ill* or well* or disorder* or disease* or health* or unwell*))                                                                                                                                                                                                                                                                                                                                                                                                                                                                                                                                                                                                                                                                                                                                                                                                                                                                                                                                                                                                                                                                                                                                                                                        | 229,030   |
| S14 | (anxiety or depression or depressive or hypervigilance or agoraphobia or neuroses or neurosis or neurotic or paranoi* or catastrophiz* or catastrophis* or and obsessive-compulsive or panic or phobia or stress or ptsd or psycho* or "internalising symptom*" or "internalizing symptom*" or wellness or "seasonal affective disorder*" or psychiatr*)                                                                                                                                                                                                                                                                                                                                                                                                                                                                                                                                                                                                                                                                                                                                                                                                                                                                                                                             | 1,135,565 |
| S15 | ("dysthymic disorder*" or "use disorder" or "psychotropic drug*" or "brain disease*" or "neurotransmitter agent*" or cognitive or "social problems" or "alcohol abuse*" or "drug abuse*")                                                                                                                                                                                                                                                                                                                                                                                                                                                                                                                                                                                                                                                                                                                                                                                                                                                                                                                                                                                                                                                                                            | 200,728   |
| S16 | (S11 OR S12 OR S13 OR S14 OR S15)                                                                                                                                                                                                                                                                                                                                                                                                                                                                                                                                                                                                                                                                                                                                                                                                                                                                                                                                                                                                                                                                                                                                                                                                                                                    | 1,615,363 |
| S17 | S1 AND S10 AND S16                                                                                                                                                                                                                                                                                                                                                                                                                                                                                                                                                                                                                                                                                                                                                                                                                                                                                                                                                                                                                                                                                                                                                                                                                                                                   | 105       |

# **SCOPUS Searched July 27, 2021 Results n=95**

(( ( TITLE-ABS-KEY (( coronavirus\* OR "corona virus\*" OR oc43 OR nl63 OR 229e OR hku1 OR hcov\* OR ncov\* OR covid\* OR "sars-cov\*" OR sarscov\* OR "Sars-coronavirus\*" OR "Severe Acute Respiratory Syndrome Coronavirus\*" OR d614g )) AND NOT (( TITLE-ABS-KEY (( sars OR sars-cov OR mers OR mers-cov OR "Middle East respiratory syndrome or camel\*" OR dromedar\* OR equine OR coronary OR coronal OR coidence\* OR covidien OR influenza AND virus OR hiv OR bovine OR calves OR tgev OR feline OR porcine OR bcov )) OR ( TITLE-ABS-KEY (( ped OR pedv OR pdcov OR fipv OR fcov OR sads-cov OR canine OR ccov OR zoonotic OR "avian influenza" OR h1n1 OR h5n1 OR h5n6 OR ibv OR murine AND corona\* )) )) OR ( TITLE-ABS-KEY (( pneumonia OR covid\* OR coronavirus\* OR corona AND virus\* OR ncov\* OR 2019-ncov OR sars\* ) AND wuhan ) OR (( 2019-ncov OR ncov19 OR ncov-19 OR 2019-novel AND cov OR sars-cov2 OR sars-cov-2 OR sarscov2 OR sarscov-2 OR sars-coronavirus2 OR sars-coronavirus-2 OR "SARS-like coronavirus\*" OR coronavirus-19 OR covid19 OR covid-19 OR "covid 2019" OR "B.1.1.7" OR "B.1.351" OR "B.1.617.1" OR "B.1.617.2" OR ( variant\* W/2 ( india\* OR "South Africa\*" OR uk OR english OR brazil\* OR alpha OR beta OR delta OR gamma OR kappa OR lambda OR "P.1" OR "C.37" )) OR (( covid OR covid19 OR covid-19 ) AND pandemic\* ) OR ( coronavirus\* AND pneumonia\* )) ) OR ( TITLE (( novel OR new OR nouveau ) AND ( cov OR ncov OR covid OR coronavirus\* OR corona AND virus OR pandemi\* )) ) OR ( ABS (( novel OR new OR nouveau ) AND ( cov OR ncov OR covid OR coronavirus\* OR corona AND virus OR pandemi\* )) ) OR ( KEY (( novel OR new OR nouveau ) AND ( cov OR ncov OR covid OR coronavirus\* OR corona AND virus OR pandemi\* )) ) AND ORIG-LOAD-DATE > 20190630 ) AND ( TITLE-ABS-KEY ( "birth outcome\*" OR "birth complication\*" OR stillbirth\* OR "fetal death\*" OR "low birthweight\*" OR "low birth weigh" OR "small for gestational age" OR sga OR macrosomia OR "neonatal death" OR "congenital anomaly\*" OR "pregnancy outcome\*" OR "obstetrical outcome\*" OR "obstetrical complication\*" OR "labor complication\*" OR "spontaneous abortion\*" ) OR TITLE-ABS-KEY (( labor OR labour OR deliver\* OR childbirth\* OR birth\* ) W/3 ( prematur\* OR pre-mature\* OR preterm OR pre-term OR early OR difficult\* )) ) AND ( TITLE-ABS-KEY (( mental\* W/3 ( ill\* OR well\* OR disorder\* OR disease\* OR health\* OR unwell\* )) ) OR TITLE-ABS-KEY (( anxiety OR depression OR depressive OR hypervigilance OR agoraphobia OR neuroses OR neurosis OR neurotic OR paranoi\* OR catastrophiz\* OR catastrophis\* OR AND obsessive-compulsive OR panic OR phobia OR stress OR ptsd OR psycho\* OR "internalising symptom\*" OR "internalizing symptom\*" OR wellness OR "seasonal affective disorder\*" OR psychiatr\* )) ) OR TITLE-ABS-KEY ( "use disorder" OR "psychotropic drug\*" OR "brain disease\*" OR "neurotransmitter agent\*" OR cognitive OR "social problems" OR "alcohol abuse\*" OR "drug abuse\*" ) )

## **Cochrane Library (CDSR and Central Register of Controlled Trials) Searched July 27, 2021**

| ID  | Search                                                                                                                                                                                    | Hits  |
|-----|-------------------------------------------------------------------------------------------------------------------------------------------------------------------------------------------|-------|
| #1  | MeSH descriptor: [COVID-19] explode all trees                                                                                                                                             | 467   |
| #2  | (covid19 or "covid 19" or "coronavirus 2019" or "corona virus 2019" or "sars cov2");ti,ab,kw                                                                                              | 5991  |
| #3  | variant* near (india* or "south african" or England or UK or Brazil or alpha or beta or delta or gamma or kappa or lambda or "P.1" or "C.37")                                             | 121   |
| #4  | "B.1.1.7" or "B.1.351" or "B.1.617.1" or "B.1.617.2"                                                                                                                                      | 8     |
| #5  | wuhan and (pandemic or corona* or pneumonia)                                                                                                                                              | 284   |
| #6  | #1 or #2 or #3 or #4 or #5                                                                                                                                                                | 6175  |
| #7  | MeSH descriptor: [Pregnancy Complications] explode all trees                                                                                                                              | 12263 |
| #8  | MeSH descriptor: [Pregnancy Outcome] explode all trees                                                                                                                                    | 3750  |
| #9  | MeSH descriptor: [Obstetric Labor Complications] explode all trees                                                                                                                        | 4070  |
| #10 | MeSH descriptor: [Obstetric Labor, Premature] explode all trees                                                                                                                           | 2259  |
| #11 | MeSH descriptor: [Fetal Death] explode all trees                                                                                                                                          | 367   |
| #12 | ("adverse birth outcome" or stillbirth* or "low birthweight" or "low birth weigh" or "small for gestational age" or SGA or macrosomia or "neonatal death" or "congenital anomalies");ti   | 771   |
| #13 | ("spontaneous abortion");ti                                                                                                                                                               | 139   |
| #14 | ((labor or labour or deliver* or childbirth* or birth*) Near 3 (prematur* or pre-mature* or preterm or pre-term or early or difficult*));ti,ab                                            | 1773  |
| #15 | #7 or #8 or #9 or #10 or #11 #12 or #13 or #14                                                                                                                                            | 15308 |
| #16 | #6 and #15                                                                                                                                                                                | 16    |
| #17 | MeSH descriptor: [Mental Health] explode all trees                                                                                                                                        | 1654  |
| #18 | MeSH descriptor: [Mental Disorders] explode all trees                                                                                                                                     | 75966 |
| #19 | MeSH descriptor: [Psychology] explode all trees                                                                                                                                           | 1090  |
| #20 | MeSH descriptor: [Anxiety] explode all trees                                                                                                                                              | 8306  |
| #21 | MeSH descriptor: [Depression] explode all trees                                                                                                                                           | 12932 |
| #22 | ((mental* near 3 (ill* or well* or disorder* or disease* or health* or unwell*));ti                                                                                                       | 31    |
| #23 | ((psychiatric* near 3 (ill* or well* or disorder* or disease* or health* or unwell*));ti                                                                                                  | 4     |
| #24 | ((("dysthymic disorder" or "use disorder" or "psychotropic drug" or "brain disease" or "neurotransmitter agent" or cognitive or "social problems" or "alcohol abuse" or "drug abuse"));ti | 29197 |

|     |                                                                                                                         |        |
|-----|-------------------------------------------------------------------------------------------------------------------------|--------|
| #25 | ("seasonal affective disorder" or "internalising symptoms" or "internalizing symptoms" or "common mental disorders"):ti | 354    |
| #26 | #17 or #18 or #19 or #20 or #21 or #22 or #23 or #24 or #25                                                             | 108957 |
| #27 | #16 and #26                                                                                                             | 5      |

**PROSPERO Searched July 27, 2021**

| Line | Search for                                                                                                                                                                                                                                                                                                                                                                                                                                                                                                                                                                 | Hits  |
|------|----------------------------------------------------------------------------------------------------------------------------------------------------------------------------------------------------------------------------------------------------------------------------------------------------------------------------------------------------------------------------------------------------------------------------------------------------------------------------------------------------------------------------------------------------------------------------|-------|
| #1   | ((coronavirus or corona-virus) AND (wuhan or beijing or shanghai or Italy or South-Korea or korea or China or Chinese or 2019-nCoV or nCoV or COVID-19 or Covid19 or SARS-CoV* or SARSCov2 or ncov)) OR (pneumonia AND Wuhan) or "COVID-19" or "2019-nCoV" or "SARS-CoV" or SARSCOV2 or 2019-nCov or "2019 coronavirus" or "2019 corona virus" or covid19 or ncov OR "novel corona virus" or "new corona virus" or "nouveau corona virus" or "2019 corona virus" OR "novel coronavirus" or "new coronavirus" or "nouveau coronavirus" or "2019 coronavirus") NOT Animal:DB | 4745  |
| #2   | "birth outcome*" OR "birth complication*" OR stillbirth* OR "fetal death*" OR "low birthweight*" OR "low birth weigh" OR "small for gestational age" OR sga OR macrosomia OR "neonatal death" OR "congenital anomal*" OR "pregnancy outcome*" OR "obstetrical outcome*" OR "obstetrical complication*" OR "labor complication*" OR "spontaneous abortion*" NOT Animal:DB                                                                                                                                                                                                   | 3042  |
| #3   | "difficult labo*" or "premature labo*" or "preterm labo*" or "early labo*" NOT Animal:DB                                                                                                                                                                                                                                                                                                                                                                                                                                                                                   | 247   |
| #4   | "difficult birth*" or "premature birth*" or "preterm birth*" or "early birth*" or "immature birth*" NOT Animal:DB                                                                                                                                                                                                                                                                                                                                                                                                                                                          | 1286  |
| #5   | "difficult childbirth*" or "premature childbirth*" or "preterm childbirth*" NOT Animal:DB                                                                                                                                                                                                                                                                                                                                                                                                                                                                                  | 0     |
| #6   | "obstetrical complication*" or "fetus death*" or stillbirth* NOT Animal:DB                                                                                                                                                                                                                                                                                                                                                                                                                                                                                                 | 876   |
| #7   | "mental ill*" or "mental* well*" or "mental disease*" or "mental* disorder*" or "mental* unwell*" NOT Animal:DB                                                                                                                                                                                                                                                                                                                                                                                                                                                            | 5075  |
| #8   | "psychiatric* disease*" or "psychiatric* ill*" or "psychiatric* disorder*" or "psychiartric* health*" NOT Animal:DB                                                                                                                                                                                                                                                                                                                                                                                                                                                        | 1658  |
| #9   | anxiety OR depression OR depressive OR hypervigilance OR agoraphobia OR neuroses OR neurosis OR neurotic OR paranoi* OR catastrophiz* OR catastrophis* OR AND obsessive-compulsive OR panic OR phobia OR stress OR wellness OR "seasonal affective disorder*" NOT Animal:DB                                                                                                                                                                                                                                                                                                | 9190  |
| #10  | "use disorder" OR "psychotropic drug*" OR "brain disease*" OR "neurotransmitter agent*" OR cognitive OR "social problems" OR "alcohol abuse*" OR "drug abuse*" NOT Animal:DB                                                                                                                                                                                                                                                                                                                                                                                               | 11626 |
| #11  | #3 OR #4 OR #5 OR #6 OR #2                                                                                                                                                                                                                                                                                                                                                                                                                                                                                                                                                 | 3557  |
| #12  | #7 OR #8 OR #9 OR #10                                                                                                                                                                                                                                                                                                                                                                                                                                                                                                                                                      | 20246 |
| #13  | #1 AND #11 AND #12                                                                                                                                                                                                                                                                                                                                                                                                                                                                                                                                                         | 13    |
